# Supplementary material for: Multiwall carbon nanotube ensembled biopolymer electrode for selective determination of isoniazid in vitro
Source: Royal Society of Chemistry journal article supplement (doi:10.1039/c4ay00154k), 2014-01-01
Supplement: c4ay00154k1.pdf [file c4ay00154k1.pdf]

## **Multiwall Carbon Nanotube Ensembled Biopolymer Electrode for Selective Determination of Isoniazid *in-vitro***

M. Satyanarayana, K. Koteswara Reddy, K. Vengatajalabathy Gobi\*

Department of Chemistry, National Institute of Technology, Warangal, Andhra Pradesh

506004, India.

## Supporting information:

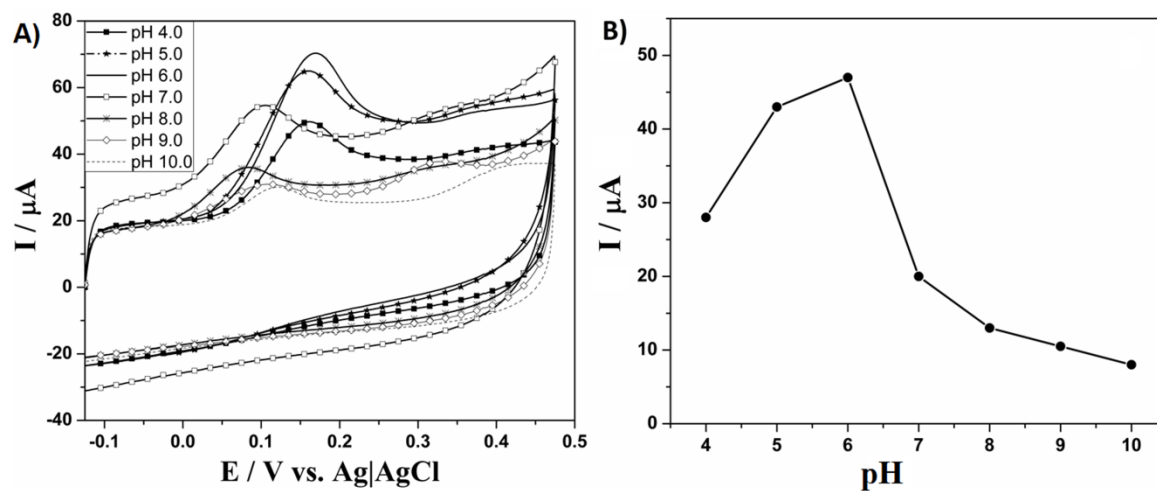

**Fig. S1.** (A) CVs of 0.1 mM isoniazid recorded at MWCNT-chit/GCE in B-R buffer at different pH values (4.0 – 10.0). Scan rate = 100 mV s<sup>-1</sup>. (B) Plot of  $i_p$  vs pH of B-R buffer

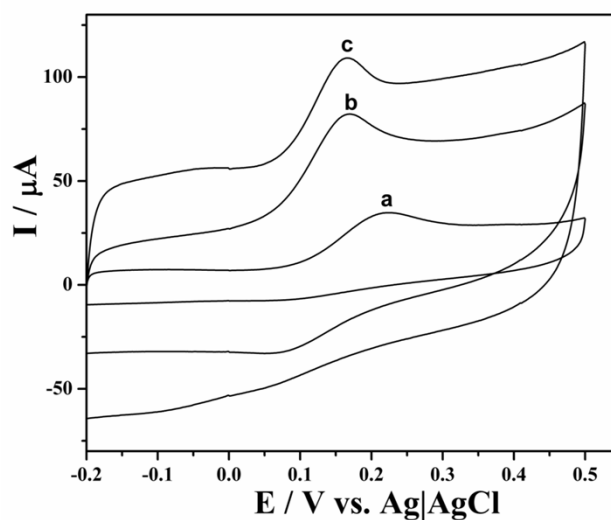

**Fig. S2.** CVs of 0.1 mM isoniazid in B-R buffer (pH 6.0) using MWCNT-chit/GCE fabricated with (a) 1 mg mL<sup>-1</sup> (b) 2 mg mL<sup>-1</sup> and (c) 3 mg mL<sup>-1</sup> of MWCNT. Scan rate 100 mV s<sup>-1</sup>.

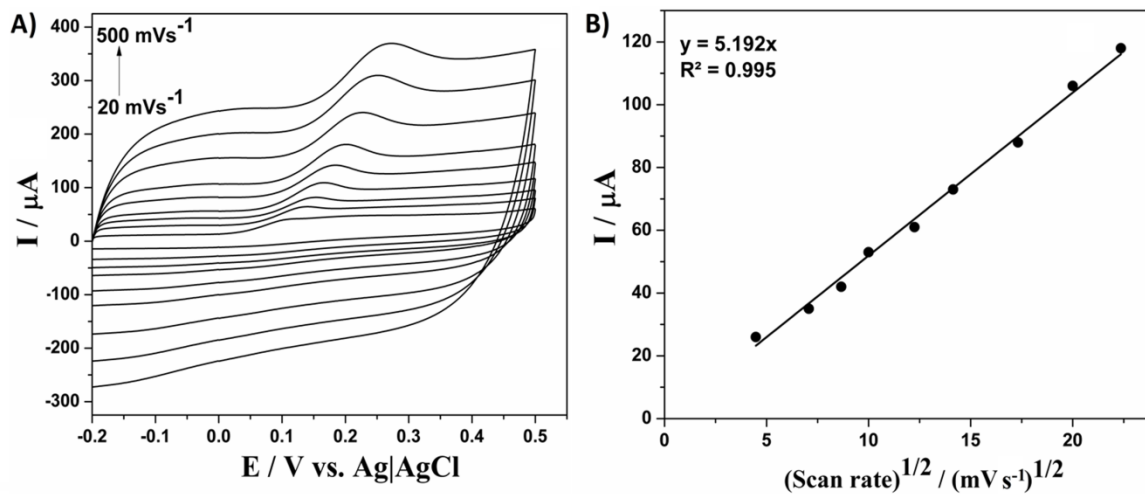

**Fig. S3.** (A) CVs of 0.1 mM isoniazid in B-R buffer (pH 6.0) using MWCNT-chit/GCE at scan rates 20, 50, 75, 100, 150, 200, 300, 400 and 500 mV s<sup>-1</sup>. B) Plot of  $i_p$  vs square root of scan rate.
